# Supplementary material
Source: Springer Nature journal article supplement (https://www.springermedizin.de/resource/supplementary/12913_2013_3105_MOESM4_ESM.pdf/9532444)
Supplement: MOESM4 [file 9532444]

|                                                    |                      | The validated FB (2.0)                    |        |                   |       |       |               |
|----------------------------------------------------|----------------------|-------------------------------------------|--------|-------------------|-------|-------|---------------|
|                                                    |                      | Do you have problems with joint mobility? |        |                   |       |       |               |
|                                                    |                      | No                                        | Slight | Moderate problems | Major | Total | Total walking |
| The FB (2.0)<br>Do you have problems with walking? | Total                | 1                                         |        |                   | 2     | 2     | 5             |
|                                                    | Major                | 1                                         |        | 5                 | 4     |       | 10            |
|                                                    | Moderate             | 1                                         | 5      | 4                 | 2     |       | 12            |
|                                                    | Slight               | 2                                         | 3      | 3                 |       |       | 8             |
|                                                    | No problems          | 2                                         |        | 2                 | 2     |       | 6             |
|                                                    | Total joint mobility | 7                                         | 8      | 14                | 10    | 2     | 41            |
